# Supplementary material for: Feasibility of using an Early Warning Score for preterm or low birthweight infants in a low-resource setting: results of a mixed-methods study at a national referral hospital in Kenya
Source: PubMed Central journal article supplement — BMJ Open. 2020 Oct 28;10(10):e039061. doi: 10.1136/bmjopen-2020-039061 (PMC7594348; doi:10.1136/bmjopen-2020-039061), 2020-10-28
Supplement: bmjopen-2020-039061supp001.pdf [file bmjopen-2020-039061supp001.pdf]

**Newborn Early Warning Trigger and Track (NEWTT)**

Patient label

| Action                                 | Continue observations as planned       |                                                       |
|----------------------------------------|----------------------------------------|-------------------------------------------------------|
|                                        | 1 in amber                             | Escalate concern to senior midwife and review 30 mins |
|                                        | 2 in amber                             | Immediate escalation to ANNP / Doctor                 |
|                                        | 1 in red                               | Immediate escalation to ANNP / Doctor                 |
| Reason for Observations                |                                        | Signed                                                |
| Frequency and Duration of Observations |                                        |                                                       |
| Date                                   |                                        |                                                       |
| Time                                   |                                        |                                                       |
| Temperature                            | 38                                     |                                                       |
|                                        | 37                                     |                                                       |
|                                        | 36                                     |                                                       |
|                                        |                                        |                                                       |
| Heart Rate                             | 180                                    |                                                       |
|                                        | 170                                    |                                                       |
|                                        | 160                                    |                                                       |
|                                        | 150                                    |                                                       |
|                                        | 140                                    |                                                       |
|                                        | 130                                    |                                                       |
|                                        | 120                                    |                                                       |
|                                        | 110                                    |                                                       |
|                                        | 100                                    |                                                       |
|                                        | 90                                     |                                                       |
| Respirations                           | 80                                     |                                                       |
|                                        | 70                                     |                                                       |
|                                        | 60                                     |                                                       |
|                                        | 50                                     |                                                       |
|                                        | 40                                     |                                                       |
|                                        | 30                                     |                                                       |
|                                        |                                        |                                                       |
| Grunting                               |                                        |                                                       |
| SaO <sub>2</sub> / Colour              | Pale or Blue or SaO <sub>2</sub> < 90% |                                                       |
|                                        | SaO <sub>2</sub> 91 – 94%              |                                                       |
|                                        | Pink >95%                              |                                                       |
| Behaviour                              | Floppy/ not feeding                    |                                                       |
|                                        | Jittery/ irritable/ poor feeding       |                                                       |
|                                        | Active/ feeding well                   |                                                       |
|                                        | Blood Glucose                          |                                                       |
| Bilirubin                              |                                        |                                                       |
| Initials                               |                                        |                                                       |

## Newborn Early Warning Trigger and Track (NEWTT)

**At Risk Infants – Please tick box as appropriate. Record reason for observation, frequency and duration overleaf .**

**Sepsis**

 Infants fulfilling NICE (2012) criteria

PROM > 18hours Preterm

PROM > 24 hours Term

Maternal Temperature > 38°C

Chorioamnionitis

Maternal GBS in vaginal swab/ or MSU

Confirmed invasive GBS sepsis in previous baby

**Intrapartum**

Meconium Stained Liquor (requiring intervention)

Cord arterial pH  $\leq$  7.1

Base Excess  $\geq$  - 12mmol/l

APGAR  $\leq$  7 at 5 minutes

Other – Specify reason  
.....

**Metabolic : Blood Sugar Monitoring**

Maternal Diabetes

Maternal  $\beta$  Blockers

Birthweight <2<sup>nd</sup> centile

Other – Specify reason  
.....

**Other**

IPPV > 5 minutes

Maternal pethidine < 6 hours before delivery

< 37 weeks gestation

Other – Specify reason .....

**Weight on 2<sup>nd</sup> centile in Kg.**

| GA | Boys | Girls |
|----|------|-------|
| 35 | 1.65 | 1.60  |
| 36 | 1.90 | 1.80  |
| 37 | 2.10 | 2.00  |
| 38 | 2.30 | 2.20  |
| 39 | 2.50 | 2.45  |
| 40 | 2.65 | 2.60  |
| 41 | 2.8  | 2.75  |
| 42 | 2.9  | 2.85  |

**Infants that need immediate review by Doctor /ANNP**

**Jaundice < 24 hours**

**Bilious Vomiting**

**Abnormal Movements**

**Hypoglycaemia**

**Apnoea**

**These criteria are a guide only to increase surveillance on infants of potential concern. It can be expanded upon to meet local requirements and guidelines.**
