# Supplementary material for: Feasibility of using an Early Warning Score for preterm or low birthweight infants in a low-resource setting: results of a mixed-methods study at a national referral hospital in Kenya
Source: PubMed Central journal article supplement — BMJ Open. 2020 Oct 28;10(10):e039061. doi: 10.1136/bmjopen-2020-039061 (PMC7594348; doi:10.1136/bmjopen-2020-039061), 2020-10-28
Supplement: bmjopen-2020-039061supp002.pdf [file bmjopen-2020-039061supp002.pdf]

**Supplementary material 2 – Stakeholder types**

| <b>Stakeholder type</b>                                       | <b>Number of stakeholders</b> |
|---------------------------------------------------------------|-------------------------------|
| Ministry of Health representative                             | 15                            |
| World Health Organisation (WHO) representative                | 2                             |
| Senior nursing staff                                          | 2                             |
| Newborn Unit Nurse                                            | 4                             |
| Neonatologist / Paediatrician                                 | 8                             |
| Public health consultant                                      | 1                             |
| Obstetrician                                                  | 6                             |
| Hospital managers                                             | 3                             |
| Midwife                                                       | 1                             |
| NGO (non-government organisation) representative <sup>1</sup> | 17                            |
| Kenya Paediatric Association representative                   | 3                             |
| Researcher                                                    | 8                             |
| Research team (UK and Kenya)                                  | 8                             |

<sup>1</sup> NGOs represented: Population Council Kenya, Pharm Access Foundation, Options, JH Piego, Path, UNICEF, Global Health strategies, Still a Mum, Beyond Zero
